# Supplementary material
Source: MDPI journal article supplement (https://www.mdpi.com/2504-3129/2/3/22)
Supplement: s1 [file s1 › nitrogen-1129043-supplementary.pdf]

# **Poultry Manure Induced Garden Eggs Yield and Soil Fertility in Tropical and Semi-Arid Sandy-Loam Soils.**

Isaac Kwadwo Mpanga <sup>1,\*</sup>, Eric Adjei <sup>2</sup>, Harrison Kwame Dapaah <sup>2</sup> and Kwadwo Gyasi Santo <sup>2</sup>

<sup>1</sup> College of Agriculture and Life Sciences, University of Arizona, Cooperative Extension, 2830 N Commonwealth Dr., 86322 Camp Verde, AZ, USA.

<sup>2</sup> School of Agriculture and Technology, University of Energy and Natural Resources, Sunyani P.O. Box 214, Ghana; przyeric@yahoo.com (E.A.); harrison.dapaah@uenr.edu.gh (H.K.D.); kwadwo.santo@uenr.edu.gh (K.G.S.)

\* Correspondence: mpangai@arizona.edu or mpangaisaac75@gmail.com; Tel.: +1-928-554-8995

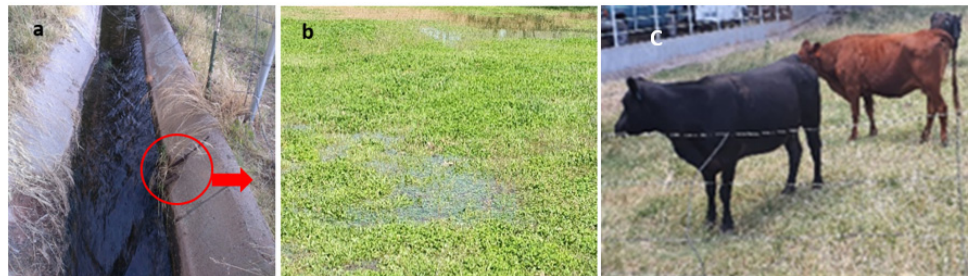

**Figure S1.** A ditch flow (a), flooded pasture field (b), and grazing cattle at the University of Arizona. Cracchiolo DK Ranch experiment station (c) [33].
